# Supplementary material for: Neutrophil-Derived Extracellular Vesicles Activate Platelets after Pneumolysin Exposure
Source: MDPI journal article supplement (doi:10.3390/cells10123581), 2021-12-18
Supplement: s1 [file s1]

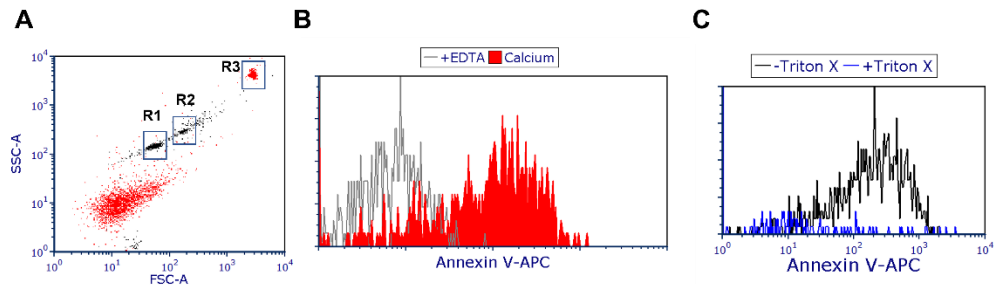

**Supplementary Figure S1. Neutrophil-derived extracellular vesicle (nEV) characterization.** Human neutrophils were treated with PLY (100 ng/ml) and nEVs were isolated from the cell culture supernatant and characterized by flow cytometry. (A) nEVs are smaller than 1  $\mu$ m. Representative dot plot of isolated human nEVs and sizing beads that were run in parallel. Gate 1 (R1) includes beads of 1  $\mu$ m, gate R2 beads of 2  $\mu$ m and gate R3 beads of 7  $\mu$ m (counting beads). (B) nEVs are annexin V positive. Representative histogram showing nEVs after staining with annexin V in the presence (red) or absence of calcium (open histogram-no fill), and (C) nEVs are membrane vesicles that can be disrupted by the detergent, Triton X-100. Representative histogram of annexin V-stained nEVs after Triton X-100 treatment.

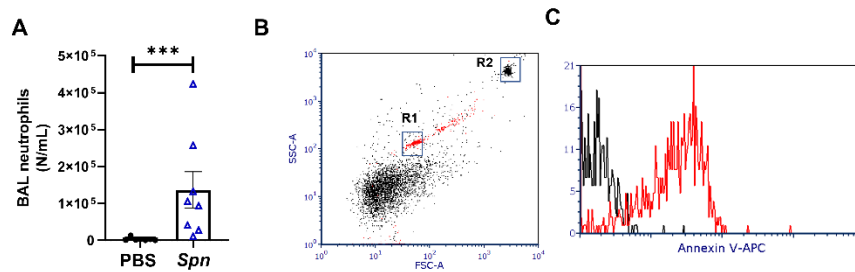

**Supplementary Figure S2. Bronchoalveolar lavage neutrophils and EVs.** A. Neutrophil counts were determined in BAL of mice 48 hours after *S. pneumoniae* (*Spn*) infection. N=7-8 mice/group. \*\*\*p<0.001, Mann-Whitney test. B. Representative dot plot of BAL EVs and sizing beads that were run in parallel. Gate 1 (R1) includes beads of 1  $\mu$ m and gate R2 beads of 7  $\mu$ m (counting beads). C. BAL EVs are annexin V positive. Representative histogram showing BAL EVs after staining with annexin V in the presence (red line) or absence of calcium (black line).

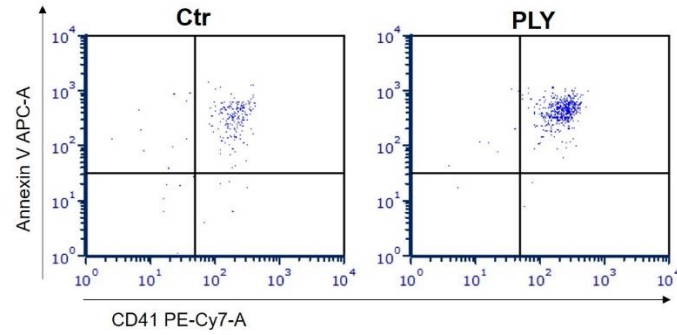

**Supplementary Figure S3. Increased production of EVs from murine platelets treated with pneumolysin.** Murine platelets were treated with PLY or PBS (control). The platelet suspension was stained with annexin V-APC and CD41-PE-Cy7 and analyzed by FACS. Depicted are representative dot plots of events less than 1  $\mu$ m that represent the EV population in Ctr and PLY-treated platelets. PLY induces increased production of annexin V/CD41 double positive EVs. N=3.

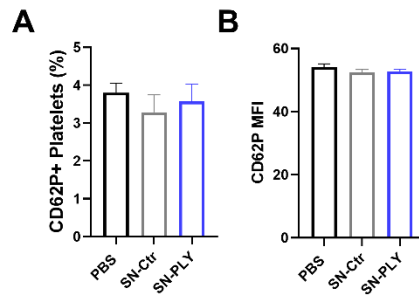

**Supplementary Figure S4. Effects of neutrophil supernatant on platelets.** Human platelets were stimulated with supernatant, SN (depleted of large EVs) from control or PLY-stimulated neutrophils, and CD62P expression was assessed by flow cytometry. (A) Percentage of CD62P positive platelets, and (B) median fluorescence intensity (MFI) of CD62P in platelets. N=6.
